# Supplementary material
Source: MDPI journal article supplement (https://www.mdpi.com/2071-1050/12/9/3896)
Supplement: s1 [file s1]

# 1 Supplementary Materials

## 2 1. Analytical Framework of the MCDA Assessment

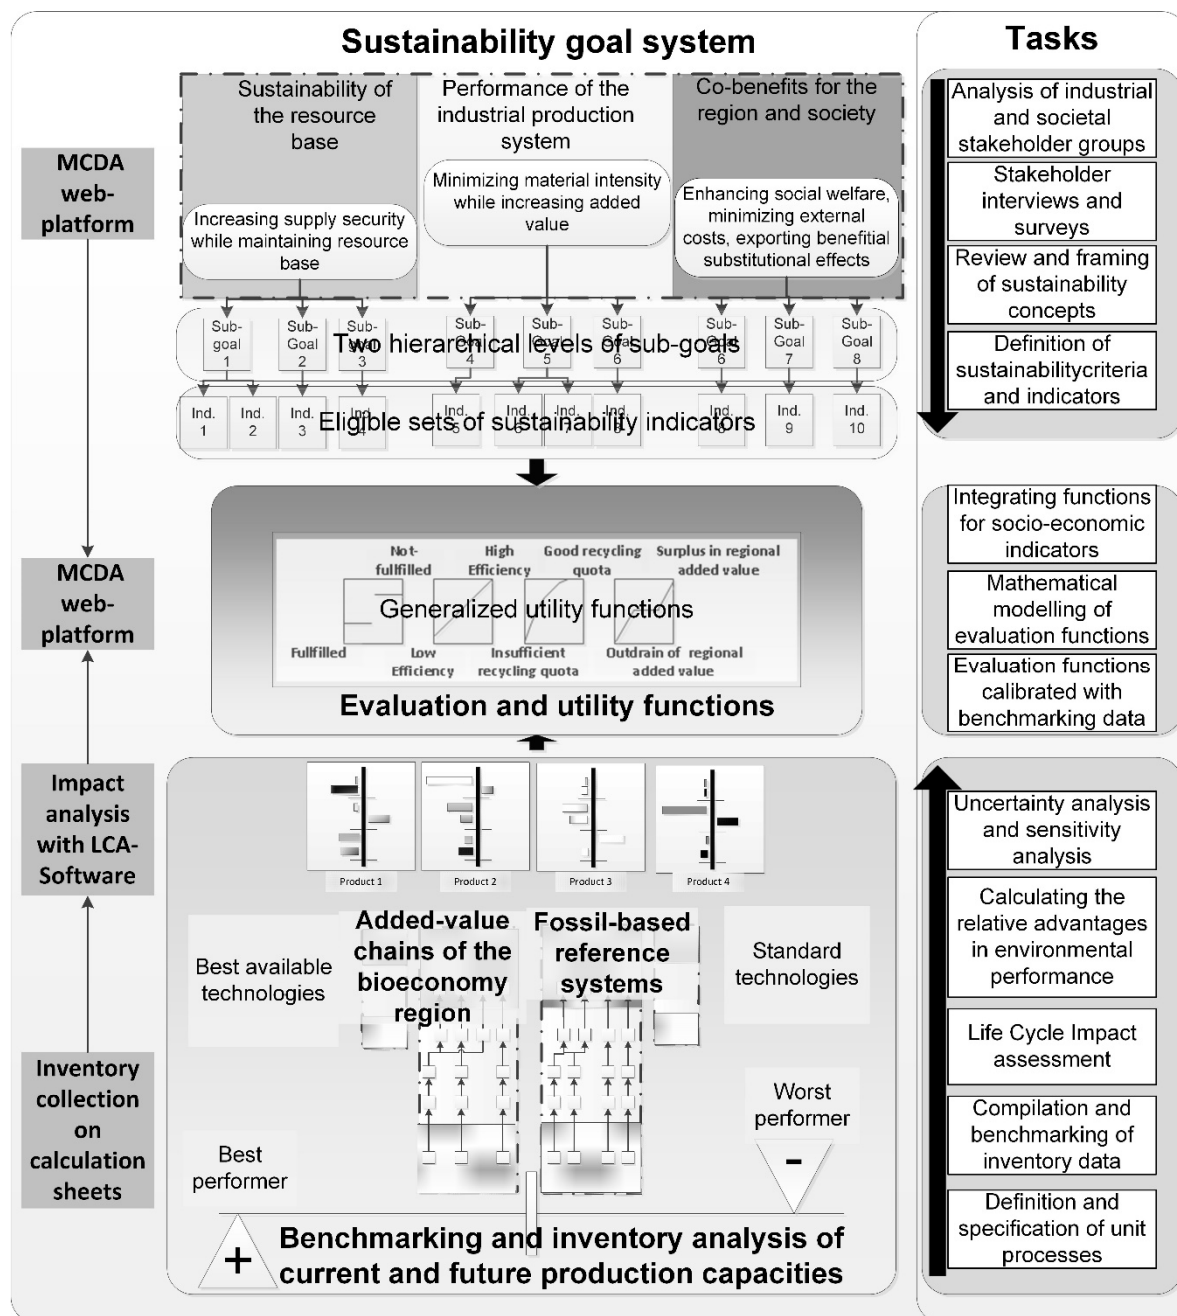

Figure S 1: Analytical and conceptual framework of the MCDA tool "SUMINISTRO"

10 **Table S 1: Material and sectoral specifications of the assessed product basket**

| Product category            | Product                                                                                        | statistic categories used for<br>sectoral benchmarks in the<br>sLCA                     | share of beech-wood<br>resource in the final<br>product                                                                       |
|-----------------------------|------------------------------------------------------------------------------------------------|-----------------------------------------------------------------------------------------|-------------------------------------------------------------------------------------------------------------------------------|
| Wood panel boards           | wood fiber insulation board                                                                    | WZ 02.10, WZ 49.20, WZ<br>49.41 WZ 16.21                                                | 10 bis 15 %                                                                                                                   |
| Engineered wood<br>products | Cross-laminated timber                                                                         | WZ 02.10, WZ 49.20, WZ<br>49.41 WZ 16.21                                                | 55%                                                                                                                           |
| Engineered wood<br>products | Moulded ply wood                                                                               | WZ 02.10, WZ 49.20, WZ<br>49.41 WZ 16.21                                                | 35%                                                                                                                           |
| Engineered wood<br>products | Laminated veneer lumber                                                                        | WZ 02.10, WZ 49.20, WZ<br>49.41 WZ 16.10 WZ<br>16.21                                    | 100%                                                                                                                          |
| Platform chemicals          | Ethylene (PET, PE)                                                                             | WZ 02.10, WZ 49.20, WZ<br>49.41 WZ 20.14, WZ 20.16,<br>WZ 22.22, WZ 22.23, WZ<br>46.901 | 100% cellulose-based                                                                                                          |
| Platform chemicals          | Lignin (premium quality)                                                                       | WZ 02.10, WZ 49.20, WZ<br>49.41 WZ 20.52                                                | 100% lignin-based                                                                                                             |
| Platform chemicals          | Polylactic Acid polymers                                                                       | WZ 02.10, WZ 49.20, WZ<br>49.41 WZ 20.14, WZ 20.16,<br>WZ 22.22, WZ 22.23, WZ<br>46.901 | 100% cellulose-based                                                                                                          |
| Composite materials         | Natural fiber reinforced<br>composite with<br>substitution of Polyol with<br>Lignin in PU-foam | WZ 02.10, WZ 49.20, WZ<br>49.41 WZ 20.52 WZ 16.21                                       | Share of flax, hemp<br>and kenaf, acrylic<br>resin and PU-foam                                                                |
| Composite materials         | Phenolic resin -based<br>boards reinforced with<br>beech wood fibers                           | WZ 02.10, WZ 49.20, WZ<br>49.41 WZ 20.52 WZ 16.22<br>WZ 20.52                           | 20% Lignin as<br>susbstitute in the<br>phenolic resin matrix<br>und 45% of beech<br>wood -based fibers<br>in the resin matrix |

2. Material flows within the wood-based industrial network

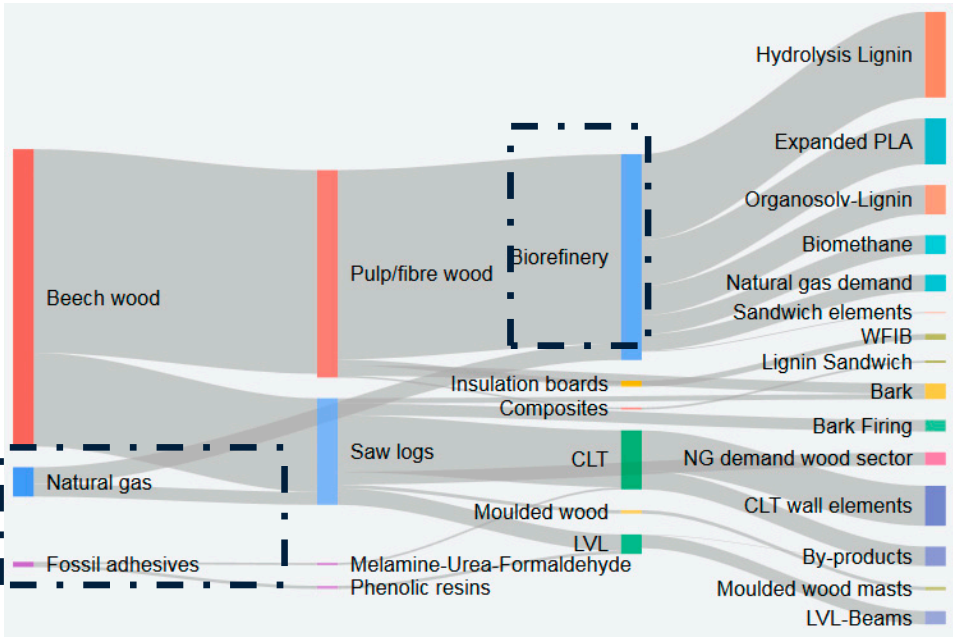

Figure S 2: Sankey Chart representing the material flows for Scenario 1

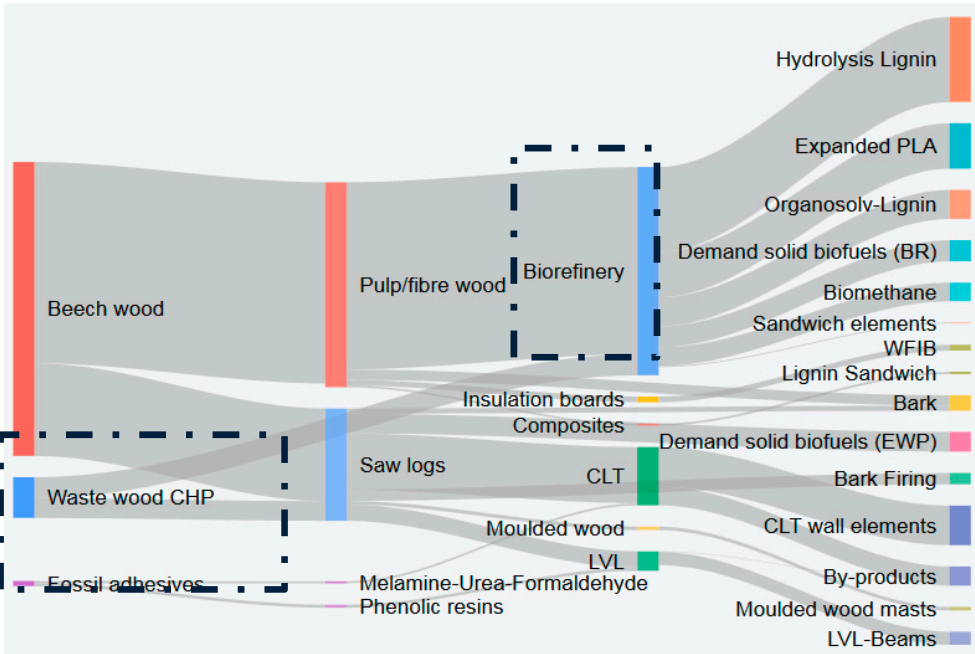

Figure S 3: Sankey Chart representing the material flows for Scenario 2

### 3. Methodology: Exemplary utility functions

**Table S 2: Qualitative scale for Indicator RB 1 “Maximizing or Guaranteeing high standards of raw material provision”**

| Indicator                                                             | RB 1  | Sustainability standards of raw material provision |
|-----------------------------------------------------------------------|-------|----------------------------------------------------|
| Maximize / Minimize                                                   |       | Maximize                                           |
| Aggregation level                                                     |       | Bioeconomy network                                 |
| Share of feedstocks certified with respect to sust. forest management |       |                                                    |
| Level                                                                 | Value | Product groups                                     |
| 0 % of raw materials are certified                                    | 0     |                                                    |
| Below 10 % of raw materials are certified                             | 1     |                                                    |
| Below 20 % of raw materials are certified                             | 2     |                                                    |
| Below 30 % of raw materials are certified                             | 3     |                                                    |
| Below 40 % of raw materials are certified                             | 4     |                                                    |
| Below 50 % of raw materials are certified                             | 5     |                                                    |
| Below 60 % of raw materials are certified                             | 6     | Biorefinery products                               |
| Below 70 % of raw materials are certified                             | 7     |                                                    |
| Below 80 % of raw materials are certified                             | 8     |                                                    |
| Below 90 % of raw materials are certified                             | 9     |                                                    |
| Up to 100% of raw materials are certified                             | 10    | LVL, CLT, WFIB                                     |

**Table S 3: Utility function for Indicator RB 4 “Increase of energy self-sufficiency”**

| Indicator                                                                                                  | RB 4              | Increase of energy self-sufficiency                                                                                                                                                                                                                                                                                                                                                                                                                                                                                                                                      |                |                   |   |     |      |       |      |       |      |       |      |       |     |    |      |       |     |       |      |       |      |       |      |       |      |   |   |   |
|------------------------------------------------------------------------------------------------------------|-------------------|--------------------------------------------------------------------------------------------------------------------------------------------------------------------------------------------------------------------------------------------------------------------------------------------------------------------------------------------------------------------------------------------------------------------------------------------------------------------------------------------------------------------------------------------------------------------------|----------------|-------------------|---|-----|------|-------|------|-------|------|-------|------|-------|-----|----|------|-------|-----|-------|------|-------|------|-------|------|-------|------|---|---|---|
| Aggregation level                                                                                          |                   | Bioeconomy network                                                                                                                                                                                                                                                                                                                                                                                                                                                                                                                                                       |                |                   |   |     |      |       |      |       |      |       |      |       |     |    |      |       |     |       |      |       |      |       |      |       |      |   |   |   |
| Coverage degree of energy self-sufficiency<br>[MWh <sub>self-supplied</sub> /MWh <sub>total demand</sub> ] |                   | Graph of the utility function                                                                                                                                                                                                                                                                                                                                                                                                                                                                                                                                            |                |                   |   |     |      |       |      |       |      |       |      |       |     |    |      |       |     |       |      |       |      |       |      |       |      |   |   |   |
| Evaluation (X)                                                                                             | Utility Value (Y) |                                                                                                                                                                                                                                                                                                                                                                                                                                                                                                                                                                          |                |                   |   |     |      |       |      |       |      |       |      |       |     |    |      |       |     |       |      |       |      |       |      |       |      |   |   |   |
| 1                                                                                                          | 100               | <p><b>Utility Value (Y)</b></p> <table><tr><th>Evaluation (X)</th><th>Utility Value (Y)</th></tr><tr><td>1</td><td>100</td></tr><tr><td>0.88</td><td>97.38</td></tr><tr><td>0.81</td><td>94.45</td></tr><tr><td>0.73</td><td>90.78</td></tr><tr><td>0.65</td><td>82.84</td></tr><tr><td>0.6</td><td>75</td></tr><tr><td>0.55</td><td>66.02</td></tr><tr><td>0.5</td><td>50.66</td></tr><tr><td>0.38</td><td>48.86</td></tr><tr><td>0.31</td><td>42.09</td></tr><tr><td>0.21</td><td>27.45</td></tr><tr><td>0.15</td><td>5</td></tr><tr><td>0</td><td>0</td></tr></table> | Evaluation (X) | Utility Value (Y) | 1 | 100 | 0.88 | 97.38 | 0.81 | 94.45 | 0.73 | 90.78 | 0.65 | 82.84 | 0.6 | 75 | 0.55 | 66.02 | 0.5 | 50.66 | 0.38 | 48.86 | 0.31 | 42.09 | 0.21 | 27.45 | 0.15 | 5 | 0 | 0 |
| Evaluation (X)                                                                                             | Utility Value (Y) |                                                                                                                                                                                                                                                                                                                                                                                                                                                                                                                                                                          |                |                   |   |     |      |       |      |       |      |       |      |       |     |    |      |       |     |       |      |       |      |       |      |       |      |   |   |   |
| 1                                                                                                          | 100               |                                                                                                                                                                                                                                                                                                                                                                                                                                                                                                                                                                          |                |                   |   |     |      |       |      |       |      |       |      |       |     |    |      |       |     |       |      |       |      |       |      |       |      |   |   |   |
| 0.88                                                                                                       | 97.38             |                                                                                                                                                                                                                                                                                                                                                                                                                                                                                                                                                                          |                |                   |   |     |      |       |      |       |      |       |      |       |     |    |      |       |     |       |      |       |      |       |      |       |      |   |   |   |
| 0.81                                                                                                       | 94.45             |                                                                                                                                                                                                                                                                                                                                                                                                                                                                                                                                                                          |                |                   |   |     |      |       |      |       |      |       |      |       |     |    |      |       |     |       |      |       |      |       |      |       |      |   |   |   |
| 0.73                                                                                                       | 90.78             |                                                                                                                                                                                                                                                                                                                                                                                                                                                                                                                                                                          |                |                   |   |     |      |       |      |       |      |       |      |       |     |    |      |       |     |       |      |       |      |       |      |       |      |   |   |   |
| 0.65                                                                                                       | 82.84             |                                                                                                                                                                                                                                                                                                                                                                                                                                                                                                                                                                          |                |                   |   |     |      |       |      |       |      |       |      |       |     |    |      |       |     |       |      |       |      |       |      |       |      |   |   |   |
| 0.6                                                                                                        | 75                |                                                                                                                                                                                                                                                                                                                                                                                                                                                                                                                                                                          |                |                   |   |     |      |       |      |       |      |       |      |       |     |    |      |       |     |       |      |       |      |       |      |       |      |   |   |   |
| 0.55                                                                                                       | 66.02             |                                                                                                                                                                                                                                                                                                                                                                                                                                                                                                                                                                          |                |                   |   |     |      |       |      |       |      |       |      |       |     |    |      |       |     |       |      |       |      |       |      |       |      |   |   |   |
| 0.5                                                                                                        | 50.66             |                                                                                                                                                                                                                                                                                                                                                                                                                                                                                                                                                                          |                |                   |   |     |      |       |      |       |      |       |      |       |     |    |      |       |     |       |      |       |      |       |      |       |      |   |   |   |
| 0.38                                                                                                       | 48.86             |                                                                                                                                                                                                                                                                                                                                                                                                                                                                                                                                                                          |                |                   |   |     |      |       |      |       |      |       |      |       |     |    |      |       |     |       |      |       |      |       |      |       |      |   |   |   |
| 0.31                                                                                                       | 42.09             |                                                                                                                                                                                                                                                                                                                                                                                                                                                                                                                                                                          |                |                   |   |     |      |       |      |       |      |       |      |       |     |    |      |       |     |       |      |       |      |       |      |       |      |   |   |   |
| 0.21                                                                                                       | 27.45             |                                                                                                                                                                                                                                                                                                                                                                                                                                                                                                                                                                          |                |                   |   |     |      |       |      |       |      |       |      |       |     |    |      |       |     |       |      |       |      |       |      |       |      |   |   |   |
| 0.15                                                                                                       | 5                 |                                                                                                                                                                                                                                                                                                                                                                                                                                                                                                                                                                          |                |                   |   |     |      |       |      |       |      |       |      |       |     |    |      |       |     |       |      |       |      |       |      |       |      |   |   |   |
| 0                                                                                                          | 0                 |                                                                                                                                                                                                                                                                                                                                                                                                                                                                                                                                                                          |                |                   |   |     |      |       |      |       |      |       |      |       |     |    |      |       |     |       |      |       |      |       |      |       |      |   |   |   |
| 0.88                                                                                                       | 97.38             |                                                                                                                                                                                                                                                                                                                                                                                                                                                                                                                                                                          |                |                   |   |     |      |       |      |       |      |       |      |       |     |    |      |       |     |       |      |       |      |       |      |       |      |   |   |   |
| 0.81                                                                                                       | 94.45             |                                                                                                                                                                                                                                                                                                                                                                                                                                                                                                                                                                          |                |                   |   |     |      |       |      |       |      |       |      |       |     |    |      |       |     |       |      |       |      |       |      |       |      |   |   |   |
| 0.73                                                                                                       | 90.78             |                                                                                                                                                                                                                                                                                                                                                                                                                                                                                                                                                                          |                |                   |   |     |      |       |      |       |      |       |      |       |     |    |      |       |     |       |      |       |      |       |      |       |      |   |   |   |
| 0.65                                                                                                       | 82.84             |                                                                                                                                                                                                                                                                                                                                                                                                                                                                                                                                                                          |                |                   |   |     |      |       |      |       |      |       |      |       |     |    |      |       |     |       |      |       |      |       |      |       |      |   |   |   |
| 0.6                                                                                                        | 75                |                                                                                                                                                                                                                                                                                                                                                                                                                                                                                                                                                                          |                |                   |   |     |      |       |      |       |      |       |      |       |     |    |      |       |     |       |      |       |      |       |      |       |      |   |   |   |
| 0.55                                                                                                       | 66.02             |                                                                                                                                                                                                                                                                                                                                                                                                                                                                                                                                                                          |                |                   |   |     |      |       |      |       |      |       |      |       |     |    |      |       |     |       |      |       |      |       |      |       |      |   |   |   |
| 0.5                                                                                                        | 50.66             |                                                                                                                                                                                                                                                                                                                                                                                                                                                                                                                                                                          |                |                   |   |     |      |       |      |       |      |       |      |       |     |    |      |       |     |       |      |       |      |       |      |       |      |   |   |   |
| 0.38                                                                                                       | 48.86             |                                                                                                                                                                                                                                                                                                                                                                                                                                                                                                                                                                          |                |                   |   |     |      |       |      |       |      |       |      |       |     |    |      |       |     |       |      |       |      |       |      |       |      |   |   |   |
| 0.31                                                                                                       | 42.09             |                                                                                                                                                                                                                                                                                                                                                                                                                                                                                                                                                                          |                |                   |   |     |      |       |      |       |      |       |      |       |     |    |      |       |     |       |      |       |      |       |      |       |      |   |   |   |
| 0.21                                                                                                       | 27.45             |                                                                                                                                                                                                                                                                                                                                                                                                                                                                                                                                                                          |                |                   |   |     |      |       |      |       |      |       |      |       |     |    |      |       |     |       |      |       |      |       |      |       |      |   |   |   |
| 0.15                                                                                                       | 5                 |                                                                                                                                                                                                                                                                                                                                                                                                                                                                                                                                                                          |                |                   |   |     |      |       |      |       |      |       |      |       |     |    |      |       |     |       |      |       |      |       |      |       |      |   |   |   |
| 0                                                                                                          | 0                 |                                                                                                                                                                                                                                                                                                                                                                                                                                                                                                                                                                          |                |                   |   |     |      |       |      |       |      |       |      |       |     |    |      |       |     |       |      |       |      |       |      |       |      |   |   |   |

25 **Table S 4: Utility function for Indicator RP 4 “Cascading factor”**

| Indicator                                                                                                              | RP 4                                                                                                                     | Cascading factor   |
|------------------------------------------------------------------------------------------------------------------------|--------------------------------------------------------------------------------------------------------------------------|--------------------|
| Aggregation level                                                                                                      |                                                                                                                          | Bioeconomy network |
| Share of secondary raw materials in input raw materials [ $w_{\text{secondary raw material}}/w_{\text{total input}}$ ] | <b>Graph of the utility function</b> 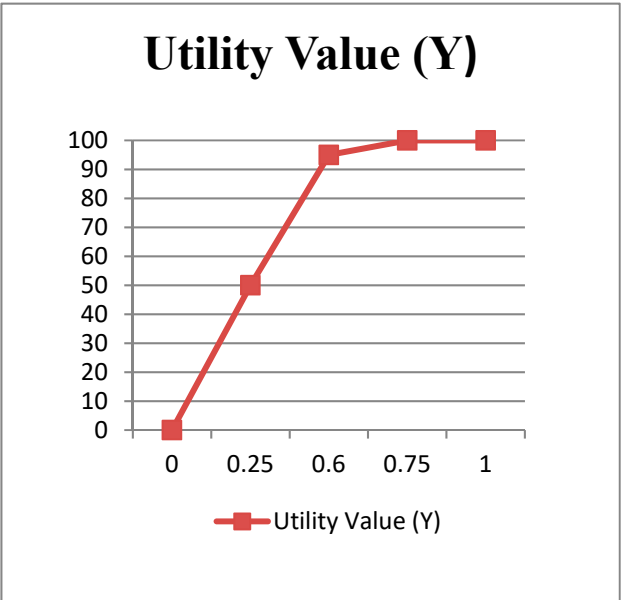 |                    |
| Evaluation (X)                                                                                                         | Utility Value (Y)                                                                                                        |                    |
| 0                                                                                                                      | 0                                                                                                                        |                    |
| 0.25                                                                                                                   | 50                                                                                                                       |                    |
| 0.6                                                                                                                    | 95                                                                                                                       |                    |
| 0.75                                                                                                                   | 100                                                                                                                      |                    |
| 1                                                                                                                      | 100                                                                                                                      |                    |

26 **Table S 5: Qualitative scale for Indicator RP 5 “Reduction of cumulative energy consumption”**

| Indicator                                                                                                                     | RP 5  | Reduction of cumulative energy consumption |
|-------------------------------------------------------------------------------------------------------------------------------|-------|--------------------------------------------|
| Maximize / Minimize                                                                                                           |       | Maximize                                   |
| Aggregation level                                                                                                             |       | Bioeconomy network                         |
| Cumulative Energy demand of the assessed product basket against the average cumulative energy consumption of reference basket |       |                                            |
| Level                                                                                                                         | Value |                                            |
| 50 % below average                                                                                                            | 10    |                                            |
| 40% below average                                                                                                             | 9     |                                            |
| 30 % below average                                                                                                            | 8     |                                            |
| 20% below average                                                                                                             | 7     |                                            |
| 10% below average                                                                                                             | 6     |                                            |
| Value is indifferent from the average of reference products                                                                   | 5     |                                            |
| 10% above average                                                                                                             | 4     |                                            |
| 20 % above average                                                                                                            | 3     |                                            |
| 30% above average                                                                                                             | 2     |                                            |
| 40 % above average                                                                                                            | 1     |                                            |
| More than 50 % above average                                                                                                  | 0     |                                            |

27 **Table S 6: Utility function for Indicator RP 7 “Reduction of GHG emissions”**

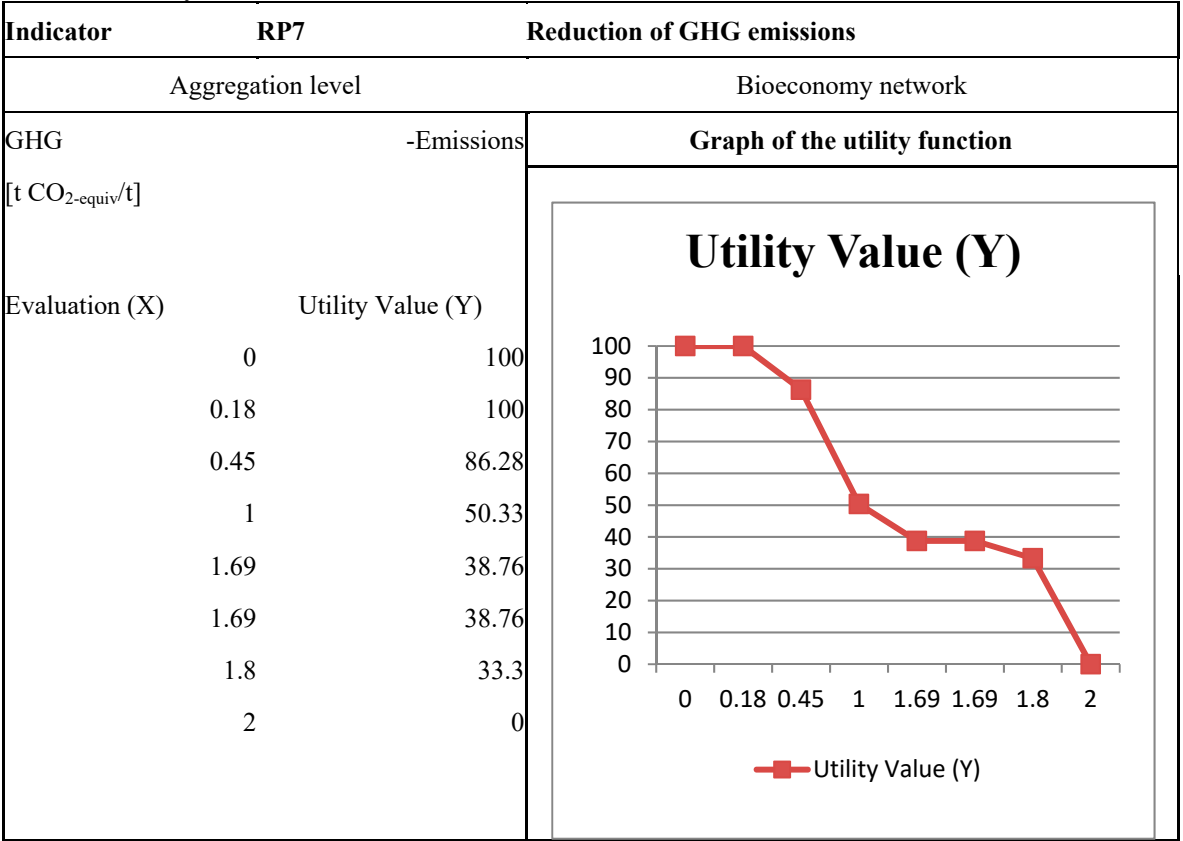

28

29 **Table S 7: Utility function for Indicator RP 8 “Minimization of water use”**

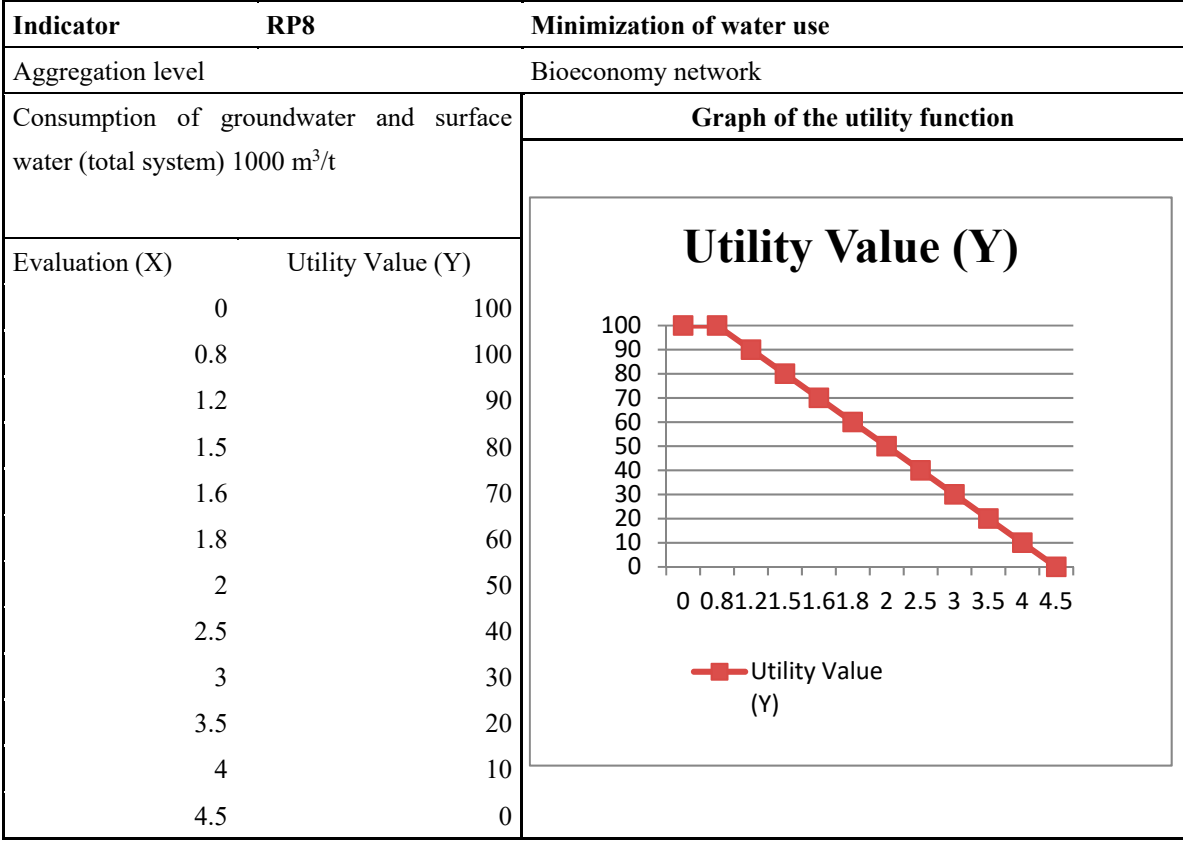

30

31 **Table S 8: Utility function for Indicator RB 8 “Adequate remuneration”**

| Indicator                                                                               | RB 8              | Adequate remuneration |
|-----------------------------------------------------------------------------------------|-------------------|-----------------------|
| Maximize / Minimize                                                                     |                   | Maximize              |
| Aggregation level                                                                       |                   | Bioeconomy network    |
| Payment compared against payments according to collective wage                          |                   |                       |
| Evaluation (X)                                                                          | Utility Value (Y) |                       |
|                                                                                         | 0                 |                       |
|                                                                                         | 1                 |                       |
|                                                                                         | 2                 |                       |
|                                                                                         | 3                 |                       |
|                                                                                         | 4                 |                       |
|                                                                                         | 5                 |                       |
|                                                                                         | 6                 |                       |
|                                                                                         | 7                 |                       |
|                                                                                         | 8                 |                       |
|                                                                                         | 9                 |                       |
|                                                                                         | 10                |                       |
| <b>Remark:</b> Calibration has to be done applying the RESPONSA-Framework of A. Siebert |                   |                       |

32

33 **Table S 9: Utility function for Indicator RB 9.1 “Minimizing the accident numbers”**

| Indicator                                                                               | RB 9.1            | Minimizing the accident numbers |
|-----------------------------------------------------------------------------------------|-------------------|---------------------------------|
| Maximize / Minimize                                                                     |                   | Minimize                        |
| Aggregation level                                                                       |                   | Bioeconomy network              |
| Number of occupational accidents per 1000 employees                                     |                   |                                 |
| Evaluation (X)                                                                          | Utility Value (Y) |                                 |
|                                                                                         | 10                |                                 |
|                                                                                         | 9                 |                                 |
|                                                                                         | 8                 |                                 |
|                                                                                         | 7                 |                                 |
|                                                                                         | 6                 |                                 |
|                                                                                         | 5                 |                                 |
|                                                                                         | 4                 |                                 |
|                                                                                         | 3                 |                                 |
|                                                                                         | 2                 |                                 |
|                                                                                         | 1                 |                                 |
|                                                                                         | 0                 |                                 |
| <b>Remark:</b> Calibration has to be done applying the RESPONSA-Framework of A. Siebert |                   |                                 |

34 **Table S 10: Utility function for Indicator RB 9.2 “Minimizing the accident numbers”**

| Indicator                                                                               | RB 9.2            | Minimizing the number of fatal accidents                                           |
|-----------------------------------------------------------------------------------------|-------------------|------------------------------------------------------------------------------------|
| Maximize / Minimize                                                                     |                   | Minimize                                                                           |
| Aggregation level                                                                       |                   | Bioeconomy network                                                                 |
| Number of fatal occupational accidents per year                                         |                   |                                                                                    |
| Evaluation (X)                                                                          | Utility Value (Y) | 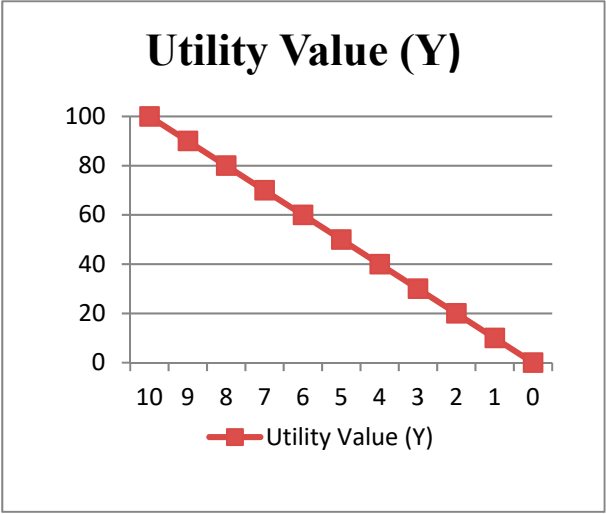 |
| 10                                                                                      | 100               |                                                                                    |
| 9                                                                                       | 90                |                                                                                    |
| 8                                                                                       | 80                |                                                                                    |
| 7                                                                                       | 70                |                                                                                    |
| 6                                                                                       | 60                |                                                                                    |
| 5                                                                                       | 50                |                                                                                    |
| 4                                                                                       | 40                |                                                                                    |
| 3                                                                                       | 30                |                                                                                    |
| 2                                                                                       | 20                |                                                                                    |
| 1                                                                                       | 10                |                                                                                    |
| 0                                                                                       | 0                 |                                                                                    |
| <b>Remark:</b> Calibration has to be done applying the RESPONSA-Framework of A. Siebert |                   |                                                                                    |

35

36 **Table S 11: Utility function for Indicator RB 11 “Prevention of occupational diseases”**

| Indicator                                                                            | RB 11             | Prevention of occupational diseases                                                  |
|--------------------------------------------------------------------------------------|-------------------|--------------------------------------------------------------------------------------|
| Maximize / Minimize                                                                  |                   | Minimize                                                                             |
| Aggregation level                                                                    |                   | Bioeconomy network                                                                   |
| Are effective organizational for the prevention of occupational diseases implemented |                   |                                                                                      |
| Evaluation (X)                                                                       | Utility Value (Y) | 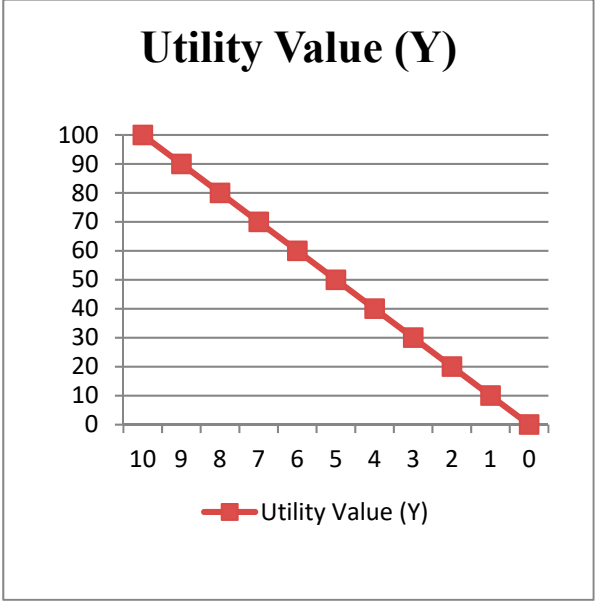 |
| 10                                                                                   | 100               |                                                                                      |
| 9                                                                                    | 90                |                                                                                      |
| 8                                                                                    | 80                |                                                                                      |
| 7                                                                                    | 70                |                                                                                      |
| 6                                                                                    | 60                |                                                                                      |
| 5                                                                                    | 50                |                                                                                      |
| 4                                                                                    | 40                |                                                                                      |
| 3                                                                                    | 30                |                                                                                      |
| 2                                                                                    | 20                |                                                                                      |
| 1                                                                                    | 10                |                                                                                      |
| 0                                                                                    | 0                 |                                                                                      |

37



## 5. Results

**Table S 12: Overview of the indicator benchmarking and the weighted average of the calibrated indicators for scenario 1 as non-normalized absolute figures**

| ID     | Description of the Indicator                                                                    | Unit                                                                   | Max.-Min. values as benchmarks for the regional product basket |           | Weighted average |
|--------|-------------------------------------------------------------------------------------------------|------------------------------------------------------------------------|----------------------------------------------------------------|-----------|------------------|
|        |                                                                                                 |                                                                        | Max.                                                           | Min.      |                  |
| RP 1   | Minimising the consumption of fresh water (ground water and surface water)                      | m <sup>3</sup> /t                                                      | 1383.151                                                       | 738.99    | 986.2            |
| RP 2   | Increasing the resource efficiency of biomass conversion                                        | w/w                                                                    | 90.701                                                         | 59.78     | 78.8             |
| RP 3   | Reduction of waste from fossil-based auxiliaries                                                | w/w                                                                    | 0.065                                                          | 0.02      | 0.046            |
| RP 4   | Cascading factor                                                                                | w/w                                                                    | 1.332                                                          | 1.00      | 1.2              |
| RP 5   | Reduction of cumulative energy consumption                                                      | MJ/t                                                                   | 58.180                                                         | 23.49     | 38.5             |
| RP 6   | Maximizing land use efficiency (forest biomass, agroforestry and agrarian biomass)              | t saw logs/ ha, t fiber/ ha, t sugar / ha, t pulp/ha, t ha*t/t Sucrose | 14.129                                                         | 4.90      | 8.7              |
| RP 7   | Reduction of GHG emissions                                                                      | t CO <sub>2</sub> -eqv./t                                              | 1.248                                                          | 0.87      | 1.035            |
| RP 8   | Increase in material efficiency                                                                 | e.g. U-Value, Tensile modulus                                          | 1.632                                                          | 0.77      | 1.1              |
| RP 9   | Employment of highly qualified employees                                                        | % of total workforce                                                   | 5.394                                                          | 3.24      | 4.0              |
| RP 10  | Employment of marginally employed persons                                                       | % of total workforce                                                   | 7.192                                                          | 2.80      | 6.2              |
| RP 11  | Employment in research and development                                                          | % of total workforce                                                   | 7.369                                                          | 5.60      | 6.3              |
| RB 1   | Maximizing or Guaranteeing high standards of raw material provision                             | w/w [t Input certified and regic                                       | 99.884                                                         | 37.22     | 74.0             |
| RB 2.1 | Maximizing the recycled content at the end of its life                                          |                                                                        | 15.215                                                         | 5.13      | 9.8              |
| RB 2.2 | Qualitative factor for multi-stage cascading (Extrusion cycles and moulding behaviour)          |                                                                        | 0.842                                                          | 0.76      | 0.8              |
| RB 4   | Maximizing the coverage degree of energy self-sufficiency                                       | % [MWh Selfsupply/MWh total demand of process energy]                  | 80.791                                                         | 30.55     | 43.1             |
| RB 5   | Maximizing the share of renewable energy                                                        | %                                                                      | 65.923                                                         | 38.46     | 43.8             |
| RB 6   | Minimizing the proportion of imported fossil resources                                          | %                                                                      | 78.093                                                         | 45.45     | 61.7             |
| RB 7   | Development of the share of protected landscape and converted forest land over time in 10 years | ha initial/ha status                                                   | n.a.                                                           | n.a.      | n.a.             |
| RB 8   | Adequate remuneration"                                                                          | Score from A. Siebert                                                  | 7.571                                                          | 4.64      | 7.0              |
| RB 9.1 | Minimizing the accident numbers                                                                 | Score from A. Siebert                                                  | 7.991                                                          | 5.99      | 7.0              |
| RB 9.2 | Minimizing the accident numbers                                                                 | Score from A. Siebert                                                  | 7.991                                                          | 1.00      | 7.0              |
| RB 11  | Prevention of occupational diseases                                                             | Score from A. Siebert                                                  | 6.807                                                          | 4.00      | 5.4              |
| RB 12  | Minimizing the cases of illness                                                                 | Score from A. Siebert                                                  | 6.492                                                          | 5.61      | 5.9              |
| RB 13  | Minimizing the cases of illness                                                                 | Score from A. Siebert                                                  | 6.892                                                          | 4.13      | 6.4              |
| RB 13  | Employess per 100 t abd.-dry of product-output                                                  | MAV 100 t atro                                                         | 0.120                                                          | 0.01      | 0.0351           |
| RB 14  | Creation of training places                                                                     | Score from A. Siebert                                                  | 7.991                                                          | 5.48      | 7.0              |
| RB 15  | Maximizing employee participation in the company                                                | Score from A. Siebert                                                  | 0.000                                                          | 0.00      | 0.0              |
| EB 1   | Maximizing municipal tax revenues                                                               | €/a für Clusterregion                                                  | n.a.                                                           | n.a.      | n.a.             |
| EB 2   | Strengthening underdeveloped rural regions                                                      |                                                                        | n.a.                                                           | n.a.      | n.a.             |
| EB 3   | Maximizing financial participation in the company                                               | Score from A. Siebert                                                  | 4.889                                                          | 1.20      | 4.8              |
| EB 4   | Maximizing financial participation in the company                                               | Score from A. Siebert                                                  | n.a.                                                           | n.a.      | n.a.             |
| EB 5   | Improvement of working conditions                                                               | Score from A. Siebert                                                  | 8.890                                                          | 4.72      | 6.2              |
| EB 6   | Improvement of working conditions                                                               | Score from A. Siebert                                                  | 6.250                                                          | 2.72      | 5.7              |
| EB 7   | No use of PBT substances                                                                        |                                                                        | 99.884                                                         | 99.88     | 99.9             |
| WS 1   | Added-value creation                                                                            | Distance from the best performer and €/t                               | 307.838                                                        | 55.08     | 233.4            |
| WS 2   | Competitive production costs                                                                    | €/t                                                                    | 483.638                                                        | 736.40    | 558.1            |
| WS 3   | Potential for capacity expansion in the competition regime (input capacities)                   | Kilotons                                                               | 2315000.000                                                    | 482500.00 | 632662.8         |

43 **Table S 13: Sources used in indicator benchmarking**

| ID     | Description of the indicator                                                           | Unit                                                                       | Sources                                                                                                                                                                                                                                                      |
|--------|----------------------------------------------------------------------------------------|----------------------------------------------------------------------------|--------------------------------------------------------------------------------------------------------------------------------------------------------------------------------------------------------------------------------------------------------------|
| RP 1   | Minimising the consumption of fresh water (ground water and surface water)             | m <sup>3</sup> /t                                                          | Questionnaires in the Leading-Edge Cluster, GaBi databases, ReCiPe Evaluation                                                                                                                                                                                |
| RP 2   | Increasing the resource efficiency of biomass conversion                               | wwt                                                                        | Iffland 2015, Budzinski & Nitzsche 2016, 2017                                                                                                                                                                                                                |
| RP 3   | Reduction of waste from fossil-based auxiliaries                                       | wwt                                                                        | Own classification of wood-based products according to waste wood categories, content of additives and common recycling pathways and infrastructure                                                                                                          |
| RP 4   | Cascading factor                                                                       | wwt                                                                        | Project meeting and questionnaires in the Leading-Edge Cluster, GaBi databases, Benchmarking studies as Richter 2007 and EPD results from IBU and others                                                                                                     |
| RP 5   | Reduction of cumulative energy consumption                                             | MJ/t                                                                       | Budzinski & Nitzsche 2016, 2017                                                                                                                                                                                                                              |
| RP 6   | Minimierung des Dampfbedarf in Bioraffinerie-Prozessen                                 | t Dampf/t                                                                  | Project questionnaires, Ecolivert Inventories, Land use projects                                                                                                                                                                                             |
| RP 7   | Maximizing land use efficiency (forest biomass, agroforestry and agrarian)             | t ha/t Sucrose                                                             | Project meeting and questionnaires in the Leading-Edge Cluster, GaBi databases, Benchmarking studies as Richter 2007 and EPD results from IBU and others                                                                                                     |
| RP 7   | Reduction of GHG emissions                                                             | t CO <sub>2</sub> -eq/t                                                    |                                                                                                                                                                                                                                                              |
| RP 8   | Increase in material efficiency                                                        | e.g. U-Value, Tensile modulus                                              | S. Franke Holzbaugtag Biel 2013, V. Thole Weichholztagung WKHNE 2014, Pollmeier 2015, Hornathem                                                                                                                                                              |
| RP 9   | Employment of highly qualified employees                                               | % of total workforce                                                       | Siebert et al 2018                                                                                                                                                                                                                                           |
| RP 10  | Employment of marginally employed persons                                              | % of total workforce                                                       | Siebert et al 2018                                                                                                                                                                                                                                           |
| RP 11  | Employment in research and development                                                 | % of total workforce                                                       | Siebert et al 2018                                                                                                                                                                                                                                           |
| RE 1   | Maximizing or Guaranteeing high standards of raw material provision                    | wwt (t input certified and regionally mobilized) / t total feedstock input | Publicly available informations on certification shares of utilized forest resources on the homepages of companies, available informations from naturplus e.V. certifications, interviews with FSC and PEFC                                                  |
| RE 2.1 | Maximizing the recycled content at the end of its life                                 | Share of waste wood categories AI and All                                  | Project workshops, meetings and internal emails, own classification of impregnated woodm products acc                                                                                                                                                        |
| RE 2.2 | Qualitative factor for multi-stage cascading (Extrusion cycles and moulding behaviour) | % [MWh Selfsupply/MWh total demand]                                        | Questionnaires in the Leading-Edge Cluster, GaBi databases, CML Evaluation                                                                                                                                                                                   |
| RE 4   | Maximizing the coverage degree of energy self-sufficiency                              | %                                                                          | Fraunhofer ISE, <a href="https://www.energy-charts.de">https://www.energy-charts.de</a> , Netbezeugung von Kraftwerken zur öffentlichen Stromversorgung, Datenquelle: 50 Hertz, Amprion, Tennet, TransnetBW, Destatis, EEX letztes Update: 21 Jan 2018 02:23 |
| RE 5   | Maximizing the share of renewable energy                                               | %                                                                          |                                                                                                                                                                                                                                                              |
| RE 6   | Minimizing the proportion of imported fossil resources                                 | ha initial/ha status                                                       | Siebert et al 2018, Zapf, I., 2015, Kohout et al. 2013                                                                                                                                                                                                       |
| RE 7   | Adequate remuneration"                                                                 | Score from A. Siebert                                                      | Siebert et al 2018, baw Bundesanstalt für Arbeitsschutz und Arbeitsmedizin, 2014.                                                                                                                                                                            |
| RE 8.1 | Minimizing the accident numbers                                                        | Score from A. Siebert                                                      | Siebert et al 2018, baw Bundesanstalt für Arbeitsschutz und Arbeitsmedizin, 2014.                                                                                                                                                                            |
| RE 8.2 | Minimizing the accident numbers                                                        | Score from A. Siebert                                                      | Siebert et al 2018, baw Bundesanstalt für Arbeitsschutz und Arbeitsmedizin, 2014.                                                                                                                                                                            |
| RE 11  | Prevention of occupational diseases                                                    | Score from A. Siebert                                                      | Siebert et al 2018, Bechmann et al. 2013 IAB-Forschungsbericht 14.                                                                                                                                                                                           |
| RE 12  | Minimizing the cases of illness                                                        | Score from A. Siebert                                                      | Siebert et al 2018, baw Bundesanstalt für Arbeitsschutz und Arbeitsmedizin, 2014.                                                                                                                                                                            |
| RE 13  | Minimizing the cases of illness                                                        | Score from A. Siebert                                                      | Siebert et al 2018, Knieps et al. 2014                                                                                                                                                                                                                       |
| RE 13  | Employess per 100 t add-ory of product-output                                          | MW/100 t atro                                                              | Siebert et al 2018, Knieps et al. 2014                                                                                                                                                                                                                       |
| RE 14  | Creation of training places                                                            | Score from A. Siebert                                                      | Siebert et al 2018.                                                                                                                                                                                                                                          |
| RE 15  | Maximizing employee participation in the company                                       | Score from A. Siebert                                                      | Siebert et al 2018, Statistik der Bundesagentur für Arbeit, 2015, 2018                                                                                                                                                                                       |
| EB 1   | Maximizing municipal tax revenues                                                      | €/a für Clusterregion                                                      |                                                                                                                                                                                                                                                              |
| EB 2   | Strengthening underdeveloped rural regions                                             |                                                                            |                                                                                                                                                                                                                                                              |
| EB 3   | Maximizing financial participation in the company                                      | Score from A. Siebert                                                      | Siebert et al 2018                                                                                                                                                                                                                                           |
| EB 4   | Maximizing financial participation in the company                                      | Score from A. Siebert                                                      | Siebert et al 2018                                                                                                                                                                                                                                           |
| EB 5   | Improvement of working conditions                                                      | Score from A. Siebert                                                      | Siebert et al 2018                                                                                                                                                                                                                                           |
| EB 6   | Improvement of working conditions                                                      | Score from A. Siebert                                                      | Siebert et al 2018                                                                                                                                                                                                                                           |
| EB 7   | No use of PBT substances                                                               |                                                                            |                                                                                                                                                                                                                                                              |
| WS 1   | Added-value creation                                                                   | €/t                                                                        | Wendler ETH 2015, UBA 3008, UBA 2012, Fachhochschule Bern 2015, Mikado Pollmeier 2015                                                                                                                                                                        |
| WS 2   | Competitive production costs                                                           |                                                                            | Wendler ETH 2015, UBA 3008, UBA 2012, Fachhochschule Bern 2015                                                                                                                                                                                               |
| WS 3   | Potential for capacity expansion in the competition regime                             | Kilograms                                                                  | Budzinski & Nitzsche 2016, Hildebrandt 2017, IEA 2013, FAO/UNECE 2014, 2015, Nova Institute 2014                                                                                                                                                             |

45 **Table S 14: Normalized results for scenarios 1,2, and 3 as presented in the radar plot in the results section**

|                                     |                                                                                         | Scenario 1:<br>Getting in<br>shape: LCF-<br>Biorefinery<br>starts its<br>operation,<br>capacities for<br>composites<br>and<br>engineered<br>wood products<br>are installed | Scenario 2:<br>Thermal<br>Cascades:<br>Waste-Wood-<br>based heat<br>substitutes<br>natural gas,<br>increase of<br>renewable<br>electricity<br>share and<br>PLA<br>production | Scenario 3:<br>Fully bio-<br>based: Resin<br>supply is fully<br>bio-based and<br>PLA<br>secondary<br>raw materials<br>recycling<br>established |
|-------------------------------------|-----------------------------------------------------------------------------------------|----------------------------------------------------------------------------------------------------------------------------------------------------------------------------|------------------------------------------------------------------------------------------------------------------------------------------------------------------------------|------------------------------------------------------------------------------------------------------------------------------------------------|
| <b>Max_Energy self-sufficiency</b>  | Maximising the energy self-sufficiency in heat supply [ % of kWh/kWh <sub>total</sub> ] | 57                                                                                                                                                                         | 75                                                                                                                                                                           | 100                                                                                                                                            |
| <b>Max_renewable electricity</b>    | Maximising share of renewable Electricity [ % of kWh/kWh <sub>total</sub> ]             | 40                                                                                                                                                                         | 65                                                                                                                                                                           | 100                                                                                                                                            |
| <b>Min_import fossil ressources</b> | Minimising the fractions of imported fossil ressources                                  | 40                                                                                                                                                                         | 65                                                                                                                                                                           | 100                                                                                                                                            |
| <b>Adequate remuneration</b>        | Fair and equal payment                                                                  | 70                                                                                                                                                                         | 70                                                                                                                                                                           | 70                                                                                                                                             |
| <b>Min_accidents</b>                | Minimising the number of accidents compared to reference companies                      | 59                                                                                                                                                                         | 62                                                                                                                                                                           | 65.0                                                                                                                                           |
| <b>Min_fatal accidents</b>          | Minimising of fatal accidents                                                           | 59                                                                                                                                                                         | 59                                                                                                                                                                           | 59                                                                                                                                             |
| <b>Min_occup. diseases</b>          | Minimising occupational diseases                                                        | 64                                                                                                                                                                         | 64                                                                                                                                                                           | 64                                                                                                                                             |
| <b>Min_illness</b>                  | Minimising illness leaves                                                               | 64                                                                                                                                                                         | 64                                                                                                                                                                           | 64                                                                                                                                             |
| <b>Create training positions</b>    | Creation of training positions                                                          | 60                                                                                                                                                                         | 65                                                                                                                                                                           | 70                                                                                                                                             |
| <b>Max_financial partizipation</b>  | Increasing financial partizipation of employess                                         | 50                                                                                                                                                                         | 50                                                                                                                                                                           | 50                                                                                                                                             |
| <b>Max_financial partizipation</b>  | Increasing financial partizipation of employess                                         | 40                                                                                                                                                                         | 40                                                                                                                                                                           | 40                                                                                                                                             |
| <b>Min_marginal employment</b>      | Shares in marginal employment compared to reference companies                           | 61                                                                                                                                                                         | 61                                                                                                                                                                           | 61                                                                                                                                             |
| <b>Reduce waste</b>                 | Reduction of aviodable production wastes                                                | 40                                                                                                                                                                         | 35                                                                                                                                                                           | 25                                                                                                                                             |

|                                        |                                                                             |      |       |         |
|----------------------------------------|-----------------------------------------------------------------------------|------|-------|---------|
| <b>Max_Profit</b>                      | Profitmargin per Ton of Product                                             | 65   | 70    | 80      |
| <b>Max_Secondary raw materials</b>     | Cascading factor at End of Product service Life                             | 10   | 25    | 35      |
| <b>Max_land-use efficiency</b>         |                                                                             | 50   | 50    | 50      |
| <b>Max_qualified employment</b>        | Shares in highly qualified employment compared to reference companies       | 39   | 40.95 | 42.9975 |
| <b>Refer_R&amp;D positions</b>         | Shares in R&D positions compared to reference companies                     | 49   | 52    | 55      |
| <b>Max_conversion efficiency</b>       | Increasing the efficiency in conversion of biomass resources                | 48.6 | 55    | 65      |
| <b>Min_cumulative carbon footprint</b> | Cumulative Carbon Footprint at factory gate                                 | 73.2 | 85    | 100     |
| <b>Max_waste wood recycling</b>        | Waste wood: Increase of of recycling at the End of the product service life | 54   | 65    | 75      |
| <b>Assurance_sustainable biomass</b>   | Sustainability assurance in biomass provisioning                            | 56.6 | 75    | 100     |
| <b>Min_CED</b>                         | Minimising the cumultaive energy demand                                     | 58.6 | 65    | 72      |
| <b>Max_GHG mitigation potential</b>    | Potential mitigation of GHG emissions                                       | 40   | 80    | 100     |

46

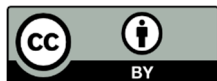

© 2020 by the authors. Submitted for possible open access publication under the terms and conditions of the Creative Commons Attribution (CC BY) license (<http://creativecommons.org/licenses/by/4.0/>).

47
